# Supplementary material for: Radiological findings in symphyseal and adductor-related groin pain in athletes: a critical review of the literature
Source: HighWire-hosted journal article supplement (doi:10.1136/bjsports-2012-091905), 2013-02-12

Figure 1 : Search results and selection of relevant articles

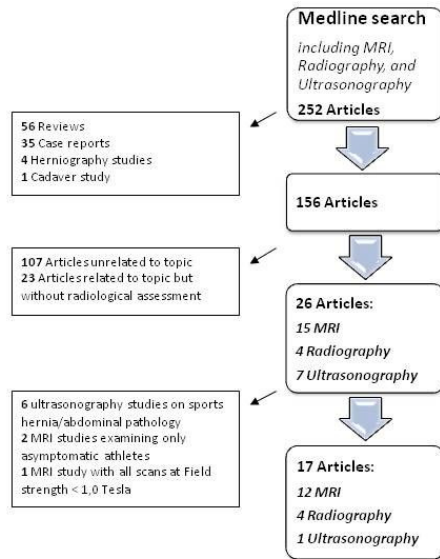

Supplement: bjsports-2012-091905supp_figure.pdf [file bjsports-2012-091905supp_figure.pdf]
